# Supplementary material
Source: Springer Nature journal article supplement (https://www.springermedizin.de/resource/supplementary/12957_2011_809_MOESM2_ESM.pdf/9565920)
Supplement: MOESM2 [file 9565920]

A grayscale B-mode ultrasound image of the parotid gland. The gland is the large, hypoechoic (darker) area on the left side of the image. The internal structure shows some heterogeneity. The text 'RT SIDED PERITONSILAR SWELLING' is overlaid in the center of the image. The background is dark, representing the anechoic areas of the neck vessels or other structures.

RT SIDED  
PERITONSILAR  
SWELLING
